# Supplementary material for: Takinib Inhibits Inflammation in Human Rheumatoid Arthritis Synovial Fibroblasts by Targeting the Janus Kinase-Signal Transducer and Activator of Transcription 3 (JAK/STAT3) Pathway
Source: MDPI journal article supplement (doi:10.3390/ijms222212580), 2021-11-22
Supplement: s1 [file s1]

## Supplementary Materials

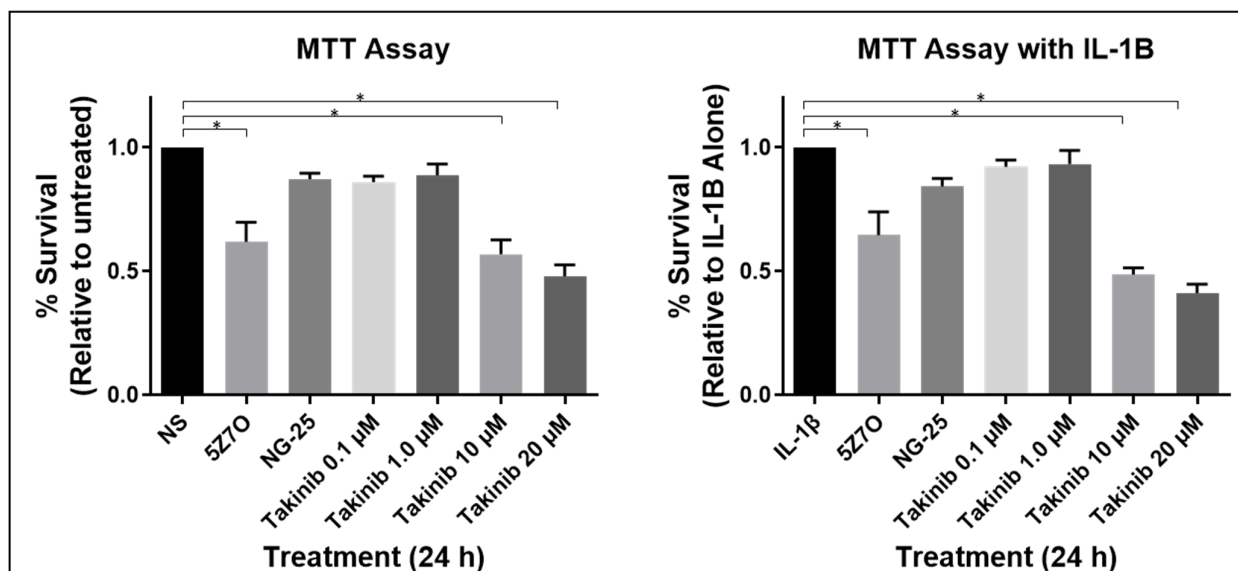

**Supplementary Figure S1:** Treatment with takinib and 5Z7O cause cell death. RASFs were starved overnight then treated with either 5Z7O, NG-25, or various doses of takinib with and without IL-1 $\beta$  (10ng/ml) for 24 hours. Takinib caused significant cell death beginning at 10  $\mu$ M. MTT assay was performed on n=3 RASF cell lines from different donors. Statistical analysis was performed using one-way ANOVA with Dunnett's post-hoc test for multiple comparisons. Significance level is  $p < 0.05$ .
